# Supplementary material
Source: PubMed Central journal article supplement (PMC5499133)

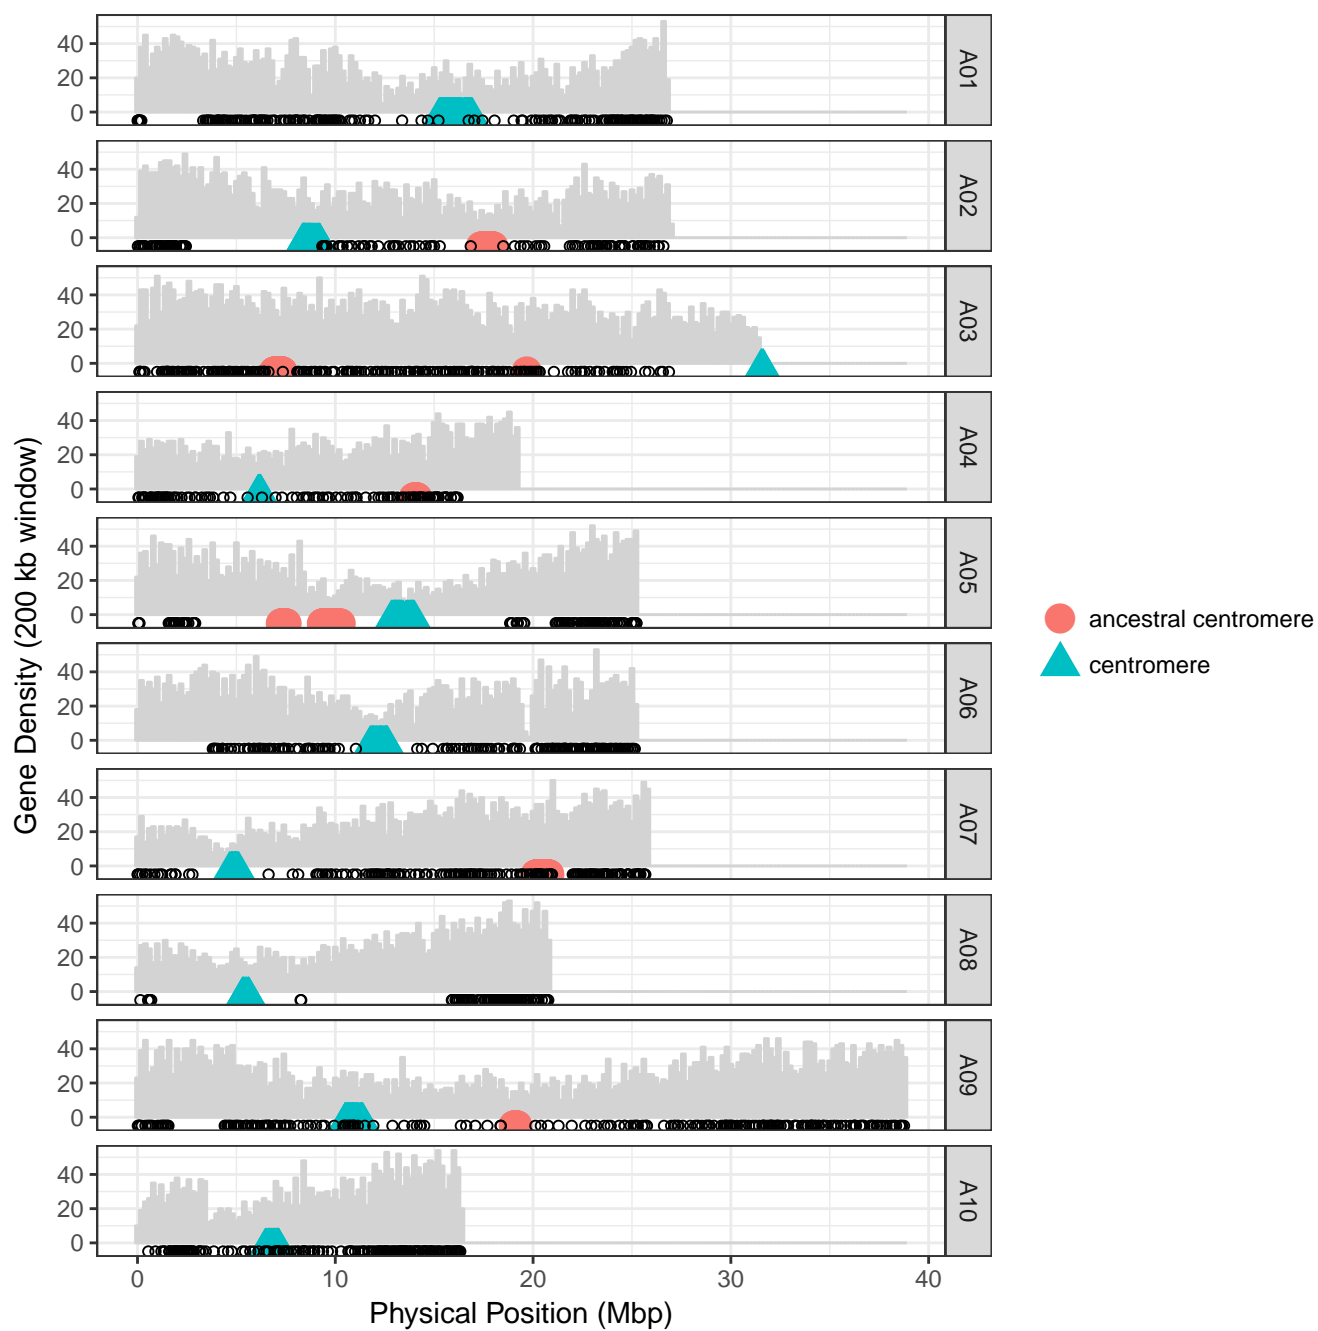

Supplement: 2259FigureS1.pdf [file 2259FigureS1.pdf]

# Genetic map

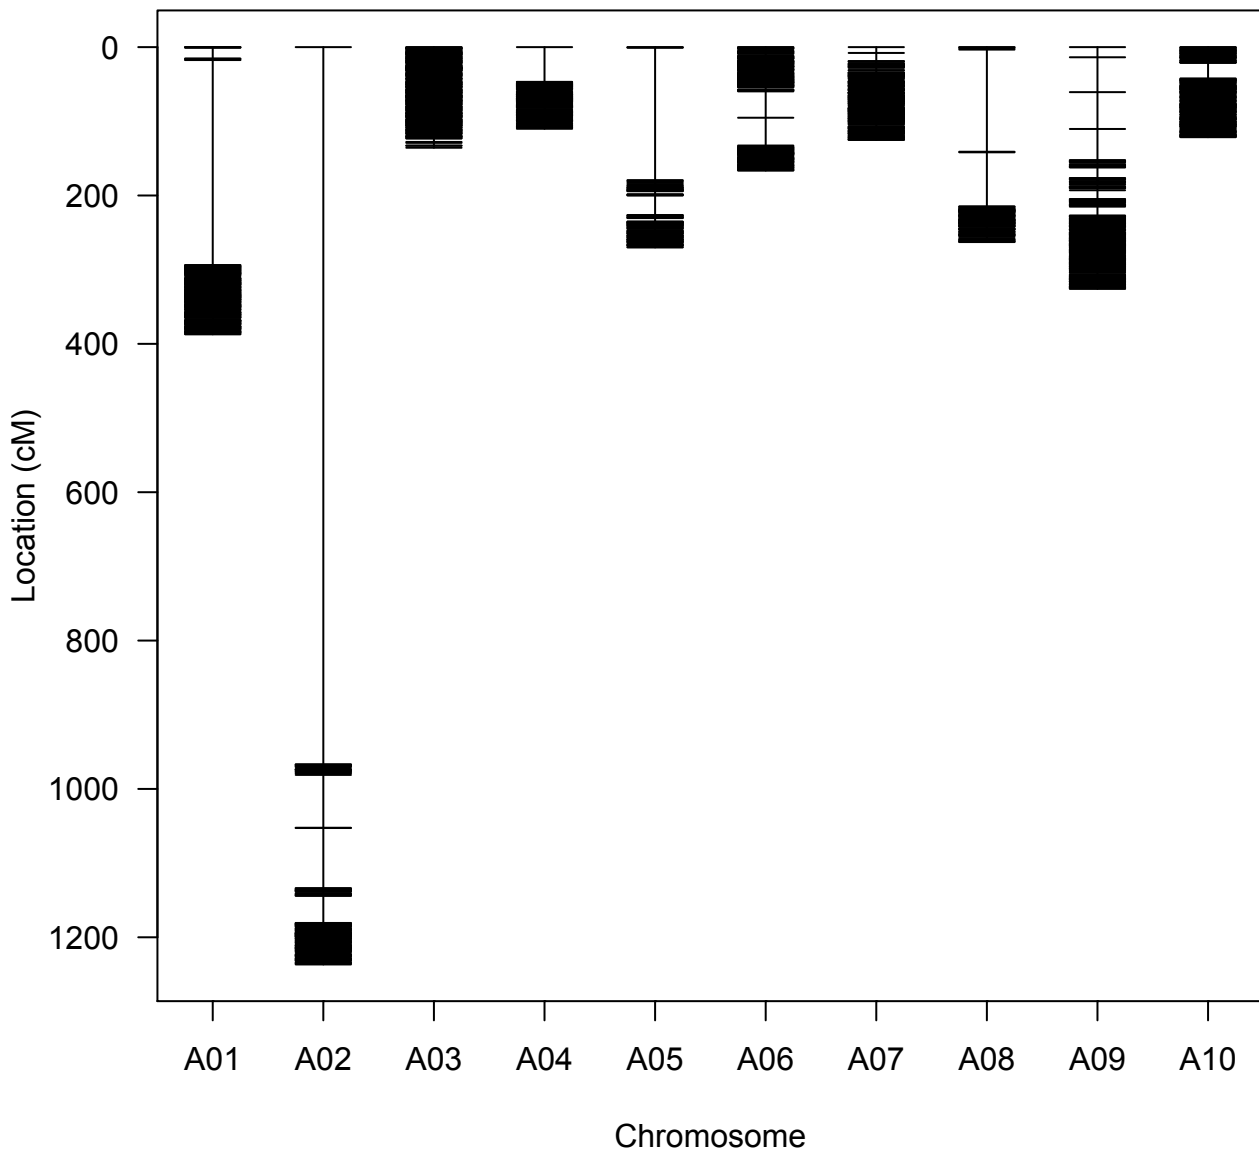

Supplement: 2259FigureS2.pdf [file 2259FigureS2.pdf]
